# Supplementary material for: Parasitic Nematode and Protozoa Status of Working Sheepdogs on the North Island of New Zealand
Source: MDPI journal article supplement (doi:10.3390/ani9030094), 2019-03-18
Supplement: s1 [file s1]

## Appendix A: Owner and Animal Details

Owners name.....Dogs name.....

### Section 1) Owner and Animal Details

**\*\*Please complete as much of this section as you are able to\*\***

**Owner**.....  
**Address**.....  
.....  
.....  
**Contact Phone(s)**.....  
**Email**.....

**Animal-Name**.....  
**Breed**.....  
**Colour**.....  
**Age** ..... **Sex:** Male / Female **Entire:** Yes ☐ No ☐

#### Pedigree

*(If your dog has trial dog pedigree please record the details here. If your dog has no trial dog pedigree, or it is unknown, please leave this blank)*

**Sire**.....

**Dam**.....

#### Other Details

.....  
.....  
.....  
.....  
.....

Record Number.....Date.....

## Appendix B: Clinical Examination

Owners name.....Dogs name.....

### Section 2) Physical Exam and Ophthalmic Exam

#### a) History / owners concerns

.....

.....

.....

a) Previous eye exam? No ☐ Yes ☐ (If yes record details on the back of the sheet)

#### b) Physical Exam Checklist

|                  | Normal                   | Abnormal                 |
|------------------|--------------------------|--------------------------|
| Distance Exam    | <input type="checkbox"/> | <input type="checkbox"/> |
| Cardiovascular   | <input type="checkbox"/> | <input type="checkbox"/> |
| Respiratory      | <input type="checkbox"/> | <input type="checkbox"/> |
| Gastrointestinal | <input type="checkbox"/> | <input type="checkbox"/> |
| Genitourinary    | <input type="checkbox"/> | <input type="checkbox"/> |
| Integument       | <input type="checkbox"/> | <input type="checkbox"/> |
| Musculoskeletal  | <input type="checkbox"/> | <input type="checkbox"/> |
| Ears             | <input type="checkbox"/> | <input type="checkbox"/> |
| Lymph Nodes      | <input type="checkbox"/> | <input type="checkbox"/> |
| Nervous System   | <input type="checkbox"/> | <input type="checkbox"/> |

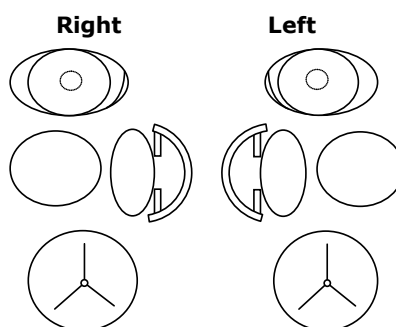

#### d) Parts of the eye

BCS \_\_\_\_\_

#### c) Eye Reflexes

|           | R.E.                     | L.E.                     |
|-----------|--------------------------|--------------------------|
| Menace    | <input type="checkbox"/> | <input type="checkbox"/> |
| Dazzle    | <input type="checkbox"/> | <input type="checkbox"/> |
| Palpebral | <input type="checkbox"/> | <input type="checkbox"/> |

|          | Normal                   | Abnormal                 | L/R   |
|----------|--------------------------|--------------------------|-------|
| Orbit    | <input type="checkbox"/> | <input type="checkbox"/> | ..... |
| Adnexa   | <input type="checkbox"/> | <input type="checkbox"/> | ..... |
| Cornea   | <input type="checkbox"/> | <input type="checkbox"/> | ..... |
| Iris     | <input type="checkbox"/> | <input type="checkbox"/> | ..... |
| Lens     | <input type="checkbox"/> | <input type="checkbox"/> | ..... |
| Vitreous | <input type="checkbox"/> | <input type="checkbox"/> | ..... |
| Fundus   | <input type="checkbox"/> | <input type="checkbox"/> | ..... |

#### c) Record details of abnormal findings below;

.....

.....

.....

.....

.....

.....

.....

#### d) Samples

|               |                          | Record number on sample? |
|---------------|--------------------------|--------------------------|
| Faecal Sample | <input type="checkbox"/> | <input type="checkbox"/> |
| Blood Sample  | <input type="checkbox"/> | <input type="checkbox"/> |
| Eye Exam      | <input type="checkbox"/> | <input type="checkbox"/> |

Record Number.....Date.....

## Appendix C: Owner Questionnaire

OWNERS NAME \_\_\_\_\_

DOGS NAME \_\_\_\_\_

---

### SECTION 3) Owner Questionnaire

*\*\*Please complete as much of this section as you are able to\*\**

**IF THE ANSWER FOR A QUESTION DIFFERS BETWEEN YOUR DOGS LEAVE THE QUESTION BLANK  
AND I WILL WRITE DOWN THE DIFFERENCES BETWEEN THE DOGS WHEN I SEE YOU**

**1. Is your dog(s) vaccinated?**

- ☐ Yes ☐ No ☐ Don't know

*If Yes to (1); How often is your dog(s) vaccinated?*

- ☐ Only when a pup ☐ Annually ☐ Every 2 years  
☐ Sporadically

**2. How often do you worm your dog(s)?**

- ☐ Only when a pup ☐ More than once a month ☐ Every 1 to 2 months ☐ Every 3 months  
☐ Every 4-6 months ☐ Annually ☐ Sporadically ☐ Never

**3. What flea treatment do you use for your dog(s)?**

- ☐ We don't use flea treatment ☐ Wash with water / Swim  
☐ Commercial dog product ☐ Commercial non-dog product (e.g. cattle or sheep etc)  
☐ Non-medicated shampoo

**4. Can your dog(s) kennel be moved?**

- ☐ Yes ☐ No

*If Yes to (4); How often do you move your dog(s) kennel?*

- ☐ Less than once a year ☐ More than once a year ☐ Never

**5. Is your dogs run\* raised off the ground?**

- ☐ Yes with solid floor ☐ Yes with slatted floor ☐ No

**\* Run;** The confined area attached to the front of the kennel or the area the dog(s) can reach when chained to the kennel

**6. How often do you clean your dog(s) kennel?**

- ☐ Less than once a year ☐ More than once a year ☐ Never

Record Number.....Date.....

OWNERS NAME \_\_\_\_\_

DOGS NAME \_\_\_\_\_

**1. How often do you feed your dog(s)?**

- ☐ Once a day                      ☐ More than once a day  
☐ Only after exercise or work    ☐ Other (*Please specify below*)

.....  
.....  
.....

**2. What do you feed your dog(s)?** (Tick as many as apply)

*If possible* can you please indicate the rough proportion of different feeds fed to your dog(s) below the tick box (i.e. 50% or half Commercial, 30% or one third Home kill, 20% or one fifth Scraps).

- ☐ Commercial dog food    ☐ Home kill                      ☐ Scraps    ☐ Other (*Please specify below*)

Proportion  
of Total;

.....  
.....

**3. If you feed Home kill meat, offal or birth tissue to your dog(s) do you treat it first (i.e. freeze or cook it)?** (*If you don't feed Home kill go straight to Question 10.*)

- ☐ Yes                      ☐ No                      ☐ Sometimes

**If Yes or Sometimes to (8); How is the meat treated?** (Tick as many as apply)

- ☐ Frozen for greater than 7 days                      ☐ Frozen for less than 7 days  
☐ Boiled or cooked for greater than 1 hour                      ☐ Boiled or cooked for less than 1 hour  
☐ Other (*Please specify below*)

.....  
.....  
.....

**4. How often does your dog(s) receive veterinary attention?**

- ☐ Only when vaccinated    ☐ Frequently                      ☐ Occasionally                      ☐ Never

**END OF SECTION 2**

**\*\* Please leave the following sections blank \*\***

Record Number.....Date.....
